# Supplementary material
Source: PubMed Central journal article supplement (PMC3488438)

# THE LANCET Oncology

## Supplementary webappendix

This webappendix formed part of the original submission and has been peer reviewed. We post it as supplied by the authors.

Supplement to: Paranjape T, Heneghan H, Lindner R, et al. A 3'-untranslated region KRAS variant and triple-negative breast cancer: a case-control and genetic analysis. *Lancet Oncol* 2011; published online March 23. DOI:DOI:10.1016/S1470-2045(11)70044-4.

**Supplemental Table 1: Receptor status of subtypes as used in this manuscript**

| <b>Breast Cancer Subtypes</b> | <b>ER</b> | <b>PR</b> | <b>Her-2</b> |
|-------------------------------|-----------|-----------|--------------|
| <b>Luminal A</b>              | +/-       | +/-       | -            |
| <b>Luminal B</b>              | +/-       | +/-       | +            |
| <b>Her-2 +</b>                | -         | -         | +            |
| <b>Triple Negative</b>        | -         | -         | -            |

**Supplemental Table 2: Description of the three separate breast cancer case-control cohorts utilized in the study**

| <b>Cohort Name</b>       | <b>Ascertainment criteria</b>                                                                                      | <b>Available receptor status</b> | <b>Age (years)</b> |
|--------------------------|--------------------------------------------------------------------------------------------------------------------|----------------------------------|--------------------|
| <b>Yale Case-Control</b> |                                                                                                                    |                                  |                    |
| Cases                    | Histologically confirmed BC cases, no prior history of cancer (except non-melanoma skin cancer) from CT, USA       | ER and PR                        | 30-80              |
| Controls                 | Cancer free healthy subjects or subjects who underwent surgery for histologically confirmed benign breast disease. |                                  | 35-85              |
| <b>Irish Cohort</b>      |                                                                                                                    |                                  |                    |
| Cases                    | Histologically confirmed BC cases from west of Ireland                                                             | ER, PR, and HER2                 | 30-80              |
| Controls                 | Healthy females, no self-reported personal history of any cancer, no family history of breast or ovarian cancer    |                                  | > 60               |
| <b>Yale TN cohort</b>    |                                                                                                                    |                                  |                    |
| TNBC cases               | Patients being treated either at YNHH in New Haven or at Bridgeport Hospital in Bridgeport, CT.                    | ER, PR, and HER2                 | 30-85              |
| Controls                 | Subjects with no prior history of cancer (except non-melanoma skin cancer)                                         |                                  | 30-80              |

**Supplemental Table 3: Demographic variables for TNBC cases and controls from the Irish cohort versus Yale cohort using Chi-square test for categorical variable such as ethnicity and t-test for the continuous variable i.e. age**

**A. TNBC cases**

| Variable                  | Ireland (n = 90) | Yale (n = 140) | P value |
|---------------------------|------------------|----------------|---------|
| Age                       | 52.09 (10.66)    | 53.2 (13.03)   | 0.4995  |
| Ethnicity                 |                  |                | <0.0001 |
| Caucasian (n = 166)       | 90 (100.00)      | 76 (54.29)     |         |
| African American (n = 50) | 0 (0.00)         | 50 (35.71)     |         |
| Hispanic (n = 11)         | 0 (0.00)         | 11 (7.86)      |         |
| Asian American (n = 3)    | 0 (0.00)         | 3 (2.14)       |         |
| KRAS status               |                  |                | 0.3863  |
| Wild type (n = 188)       | 71 (78.89)       | 117 (83.57)    |         |
| Variant (n = 42)          | 19 (21.11)       | 23 (16.43)     |         |

**B. Controls**

| Variable                  | Ireland (n = 360) | Yale (n = 570) | P value |
|---------------------------|-------------------|----------------|---------|
| Age                       | 70.78 (6.78)      | 55.14 (11.02)  | <0.0001 |
| Ethnicity                 |                   |                | <0.0001 |
| Caucasian (n = 881)       | 360 (100.00)      | 521 (91.40)    |         |
| African American (n = 44) | 0 (0.00)          | 44 (7.72)      |         |
| Hispanic (n = 5)          | 0 (0.00)          | 5 (0.88)       |         |
| KRAS status               |                   |                | 0.9271  |
| Wild type (n = 780)       | 303 (84.17)       | 477 (83.68)    |         |
| Variant (n = 150)         | 57 (15.83)        | 93 (16.32)     |         |

**Supplemental Table 4: Demographic variables for the TNBC cases and controls of all ages using Chi-square test for categorical variable such as ethnicity and t-test for the continuous variable i.e. age**

| Demographics              |                    |                 |         |
|---------------------------|--------------------|-----------------|---------|
| Variable                  | Controls (n = 930) | Cases (n = 230) | P value |
| Age                       | 61.20 (12.26)      | 52.77 (12.14)   | <0.0001 |
| KRAS                      |                    |                 | 0.4293  |
| Wild type (n = 968)       | 780 (83.87)        | 188 (81.74)     |         |
| Variant (n = 192)         | 150 (16.13)        | 42 (18.26)      |         |
| Ethnicity                 |                    |                 | <0.0001 |
| Caucasian (n = 1047)      | 881 (94.73)        | 166 (72.17)     |         |
| African American (n = 94) | 44 (4.73)          | 50 (21.74)      |         |
| Hispanic (n = 16)         | 5 (0.54)           | 11 (4.78)       |         |
| Asian (n = 3)             | 0 (0.00)           | 3 (1.30)        |         |

**Supplemental Table 5: Demographic variables for the premenopausal TNBC cases and controls using Chi-square test for categorical variable such as ethnicity and t-test for the continuous variable i.e. age**

Demographics

| <b>Variable</b>           | <b>Controls (n = 250)</b> | <b>Cases (n = 111)</b> | <b>P value</b> |
|---------------------------|---------------------------|------------------------|----------------|
| Age                       | 45.37 (4.65)              | 42.70 (5.80)           | <0.0001        |
| KRAS                      |                           |                        | 0.0331         |
| Wild type (n = 300)       | 215 (86.00)               | 85 (76.58)             |                |
| Variant (n = 61)          | 35 (14.00)                | 26 (23.42)             |                |
| Ethnicity                 |                           |                        | <0.0001        |
| Caucasian (n = 297)       | 219 (87.60)               | 78 (70.27)             |                |
| African American (n = 52) | 28 (11.20)                | 24 (21.62)             |                |
| Hispanic (n = 9)          | 3 (1.20)                  | 6 (5.41)               |                |
| Asian (n = 3)             | 0 (0.00)                  | 3 (2.70)               |                |

**Supplemental Table 6: Association of the *KRAS*-variant with triple negative breast cancer cases under 51 years of age versus controls in the Irish and Yale cohorts**

**Irish cohort\***

| Variable             | OR    | 95% CI        | P value |
|----------------------|-------|---------------|---------|
| <i>KRAS</i> -variant | 1.933 | 0.942 - 3.966 | 0.0723  |

\* Univariate analysis against all controls

**Yale cohort**

| Variable             | OR    | 95% CI        | P value |
|----------------------|-------|---------------|---------|
| <i>KRAS</i> -variant | 2.457 | 1.121 - 5.384 | 0.0248  |

Multivariate Analysis, controlled for race and age

**Supplemental Table 7: KRAS-variant differentially expressed genes within the luminal progenitor and BRCA mutant signature by LIMMA analysis in the triple negative breast cancer patients**

| Within luminal progenitor signature |          |            |       |       | Within the BRCA mutant like signature |           |            |       |       |
|-------------------------------------|----------|------------|-------|-------|---------------------------------------|-----------|------------|-------|-------|
| nulD                                | gene     | logFC      | p     | p.adj | nulD                                  | gene      | logFC      | p     | p.adj |
| W5dW0uc9PtRXFIOHmo                  | SORBS2   | 0.77024109 | 0.001 | 0.165 | reF_FIFUMuQSHaOstY                    | DUSP6     | -1.5635473 | 0.000 | 0.06  |
| rK6quXkuZ6dLdfeAJ4                  | PPP1R1B  | 0.75990879 | 0.003 | 0.212 | Zr6CDmnTPxQt.eBl94                    | TFF1      | 0.88726644 | 0.001 | 0.11  |
| 0V1kf5B1erCKhhF3r8                  | EPAS1    | -1.5277527 | 0.003 | 0.212 | 33oj15BdCIVFKZ0peg                    | GPRC5C    | -1.3698662 | 0.002 | 0.18  |
| W047wnl3994KR9_d_o                  | WFDC3    | 0.76664801 | 0.003 | 0.212 | icmjQs6EeHSHiSdR4                     | OGG1      | -0.8517652 | 0.004 | 0.24  |
| 3t4p_pnl6lia12q.i0                  | RAB24    | 0.6895776  | 0.009 | 0.338 | HIpqnaOBXYCQuJZ90                     | GLRX2     | 0.47679698 | 0.005 | 0.24  |
| NRBIFzZzNtCuhcC9Vvk                 | AURKB    | -1.5353021 | 0.011 | 0.338 | NVteQjfoacr16gsEkI                    | ZNF644    | 1.15014517 | 0.005 | 0.24  |
| ilrh6EzRdx8DW178mE                  | AKR1C3   | -0.8935685 | 0.012 | 0.338 | fCKeqM.Snv6e1exVLU                    | UNC119    | 0.73173575 | 0.006 | 0.24  |
| raaukoIRSNkqp6IJBEBE                | MATK     | 0.49838612 | 0.012 | 0.338 | fkVEOXu10U8tW5JeCE                    | VPREB3    | 0.92362289 | 0.025 | 0.47  |
| 05UqSufN4XwS53TTr0                  | TLR5     | -1.0574883 | 0.014 | 0.338 | rComieZudsntCKtNhw                    | ETFB      | -1.0538852 | 0.025 | 0.47  |
| 6BVx9xJ77R4tJHRRek                  | RAB24    | -0.8803527 | 0.014 | 0.338 | lAbVmX1KWR1IIAlnU4                    | SORD      | -0.8414537 | 0.026 | 0.47  |
| TJc6LpWwNl4e7J35ek                  | NCALD    | -1.0265287 | 0.015 | 0.338 | ul6IoQqDCFHtLinpQk                    | AFF1      | -0.7123633 | 0.028 | 0.47  |
| ropeITUUh1SsFWDHf.0                 | UBE2C    | -0.6930782 | 0.029 | 0.498 | c57uU14hr15e36q_ug                    | RBM38     | 0.57005612 | 0.029 | 0.47  |
| IO0dd56nvT7T57vSoU                  | NCALD    | -1.0912361 | 0.031 | 0.498 | WQpNqrg37cE9WK0IKc                    | WT1       | 0.35637204 | 0.029 | 0.47  |
| cRUpdfl96.fUIE_if0                  | FHL2     | -0.9577935 | 0.034 | 0.498 | xnlXiCfDUJePscuk0                     | PPP1CB    | 0.44366224 | 0.031 | 0.47  |
| KzhYQpF167CHVUCEOI                  | CAMK2N1  | -0.898999  | 0.034 | 0.498 | HidjBlYc9oot4Ro3Q                     | ZFH3      | 1.05484205 | 0.032 | 0.47  |
| f7rBCeM59S_H1LcV64                  | PNMA2    | 0.60236064 | 0.035 | 0.498 | utBKruOUcki7gAbiIo                    | P2RY10    | 0.58824966 | 0.033 | 0.47  |
| 3IN_kunvr9Ut3QhSgY                  | C4orf7   | 2.14470518 | 0.035 | 0.498 | Hkd7UFRVdBOKp9T.e4                    | AHNAK     | -0.5840241 | 0.034 | 0.47  |
| xJ1j7rJL0S0hJ1U                     | COL4A5   | -1.3394053 | 0.038 | 0.498 | KzhYQpF167CHVUCEOI                    | CAMK2N1   | -0.898999  | 0.034 | 0.47  |
| No174RVAVBcigl6guU                  | SLPI     | 1.32821488 | 0.038 | 0.498 | 96hSuqQp6iOsne.kjw                    | C14orf115 | 0.36249749 | 0.035 | 0.47  |
| itHUgn.Oi1NNGJFXIE                  | CSN3     | 1.69487059 | 0.046 | 0.561 | Z6Lq_n546eeiqGenAs                    | KCNM4     | 0.41693431 | 0.035 | 0.47  |
| Nrlw7103gv5VlnEb61                  | MAOA     | -1.2134788 | 0.053 | 0.597 | Koi5Igojafuv0V4oHo                    | NME1      | -0.469841  | 0.038 | 0.48  |
| Nkr_pVQH8gDQOQK56Q                  | MAF      | 0.42034031 | 0.057 | 0.597 | o.7wbeUVUd0VUJ3CVU                    | C1orf38   | 0.37871966 | 0.039 | 0.48  |
| 0iuaqfpUfro1En_qp8                  | PIK3R1   | 0.37430905 | 0.057 | 0.597 | WFwa905rmw_yOTsfu4                    | NPTN      | -0.2142517 | 0.046 | 0.54  |
| uIQV9XRfpFIRUofPwE                  | ITGA5    | -0.31653   | 0.058 | 0.597 | WLF_H_9Ek7KuOJHRD4                    | CA2       | 0.4793348  | 0.049 | 0.54  |
| uVwtXd.Agfeatd4JY                   | C1QTNF1  | -1.0556671 | 0.061 | 0.598 | EqRaeX9VKg13UjFBQg                    | BPI       | 0.41133271 | 0.051 | 0.54  |
| it1ISdTSgUJApSMI4Q                  | HSPB8    | -1.1720388 | 0.064 | 0.607 | ocuFe17ASQuqnkiko                     | DUSP13    | 0.37229168 | 0.056 | 0.54  |
| upHrr.53YSzUQyeGno                  | NQO1     | -0.8463655 | 0.067 | 0.607 | 6p1QpTggjsQpuXQsVY                    | STAR10    | -0.640911  | 0.060 | 0.54  |
| TgCvBJxJ2i_4kdx5CE                  | CPE      | -0.7809367 | 0.075 | 0.651 | IUfeKDoXrsER_DO7jk                    | KLHL2     | 0.40422699 | 0.062 | 0.54  |
| fMIXdRdFU745Uq0d_c                  | C1QTNF1  | -0.9906795 | 0.077 | 0.651 | NpdZqVZSJeZwPpXhZF0                   | NME2      | -1.282517  | 0.065 | 0.54  |
| 9tGSGSK2JkpYCe9Fv8                  | BMP4     | 0.49379544 | 0.083 | 0.651 | ZWm_wXShfV_ygSX92A                    | PUS1      | -0.6502441 | 0.065 | 0.54  |
| N_SiAbV_UdVHdNKULo                  | KRT15    | 0.97895087 | 0.085 | 0.651 | upHrr.53YSzUQyeGno                    | NQO1      | -0.8463655 | 0.066 | 0.54  |
| fprgRN4JRzv16dwp20                  | NKD2     | -0.4423883 | 0.086 | 0.651 | uwgl3oT4cTqooEnWpU                    | TNNT1     | 0.37817669 | 0.068 | 0.54  |
| Z1jJ2hGjuC1Rnnp1CQ                  | C19orf33 | -0.9280315 | 0.087 | 0.651 | iH79A5ONA5BdEF_ni0                    | MYC       | -0.5960534 | 0.068 | 0.54  |
| rdxCJVS3vopEv8gwo                   | PIGR     | -0.7374176 | 0.091 | 0.662 | rMDue4oOgDOuSu3604                    | ZNF644    | 0.30516255 | 0.070 | 0.54  |
| ikupIMfdEnQIwS40T0                  | SRPK2    | 0.36689011 | 0.097 | 0.680 | TgCvBIxJ2i_4kdx5CE                    | CPE       | -0.7809367 | 0.074 | 0.54  |
| r_iBj6cKOHcLse.k.U                  | TMEM45A  | 0.72481799 | 0.100 | 0.685 | opT1IU52EnhQpTjmAo                    | DCI       | -0.8140602 | 0.076 | 0.54  |
|                                     |          |            |       |       | HHS16Rd7bDSQJVFsk                     | INPP5J    | -0.6589636 | 0.077 | 0.54  |
|                                     |          |            |       |       | rXftkN64kuuSmqJSlA                    | DDX58     | 0.45766024 | 0.077 | 0.54  |
|                                     |          |            |       |       | ExO1zRe9Pui7konrIE                    | GPM6B     | -0.9870874 | 0.080 | 0.55  |
|                                     |          |            |       |       | iK8gpErpiOJasUm9eI                    | CRYM      | 0.33291961 | 0.083 | 0.55  |
|                                     |          |            |       |       | ZKcgDHzH10gV39_8Go                    | BMP2      | 0.30205644 | 0.084 | 0.55  |
|                                     |          |            |       |       | 9dX6CEoiOHV_gh14SU                    | TCF7      | 0.83647149 | 0.091 | 0.55  |
|                                     |          |            |       |       | oFV37VgjeZdy5f_Kr0                    | FAM129B   | -0.2404329 | 0.096 | 0.55  |
|                                     |          |            |       |       | u5IggLilqJeJep6Jfc                    | ORMDL3    | 0.90327229 | 0.096 | 0.55  |
|                                     |          |            |       |       | Q1KpkXSrggeB2Fkfy4                    | NME2      | -0.5310338 | 0.097 | 0.55  |
|                                     |          |            |       |       | cXSOUqt53JNLCz8kgE                    | SSR1      | 0.36145747 | 0.098 | 0.55  |
|                                     |          |            |       |       | rpzI_RervrjqnvIOXs                    | ITGB5     | -0.5851932 | 0.099 | 0.55  |



**Supplemental Table 8 : Enrichment of selected literature-derived signatures with genes identified to be *KRAS*-variant differentially expressed by LIMMA analysis in the triple negative breast cancer patients**

| <b>Signature</b>   | <b>p.adj</b> | <b>p.raw</b> | <b>maxG</b> | <b>diff. Exp</b> |
|--------------------|--------------|--------------|-------------|------------------|
| ctnnb_bild2006     | 0.61600883   | 0.045721354  | 61          | 2                |
| glyc_potapenko09   | 0.61600883   | 0.052426283  | 151         | 3                |
| intrinsic_hu06     | 1            | 0.688155238  | 823         | 4                |
| mek_dry2010        | 0.43918195   | 0.009344297  | 148         | 4                |
| safb12_chiptargets | 0.7154859    | 0.091338625  | 429         | 5                |
| safb12_mrnatargets | 0.64952229   | 0.069098116  | 519         | 6                |
| wound.chang.down   | 0.51678369   | 0.021990795  | 41          | 2                |
| wound.chang.up     | 1            | 0.387976745  | 87          | 1                |

Abbreviations : p.adj: FDR-adjusted p-value, maxG: The number of genes in the signature represented on the Illumina microarray, diff. Exp: the number of genes in that signature found to be differentially expressed.

| nuID                | gene     | logFC  | p-value   | p.adj |
|---------------------|----------|--------|-----------|-------|
| xu0rGiKPdOHt8XceDM  | KAL1     | 1.161  | 3.27E-006 | 0.060 |
| 31179x0SbWKt66WJXg  | ABHD2    | 1.197  | 3.08E-005 | 0.211 |
| 6p2cSR6PJ6AXXqIXE8  | CHTF8    | -1.762 | 5.41E-005 | 0.211 |
| 63x3kkE6Klv_7Li7qY  | INSC     | 0.952  | 5.80E-005 | 0.211 |
| IES9SLO6FVQLUiPlco  | LIX1     | 0.862  | 7.67E-005 | 0.211 |
| lno3WLIWlq4ompEqQ   | BTBD3    | 0.892  | 9.30E-005 | 0.211 |
| uqeojiurejf90ibdTk  | SIDT2    | 0.704  | 9.45E-005 | 0.211 |
| uSgLvder_5UU65g14U  | CAMK2A   | 1.081  | 1.01E-004 | 0.211 |
| f95JXtx_pFVFF7ye68  | BAG3     | -2.012 | 1.21E-004 | 0.211 |
| rVUch7idfipSh83e9k  | NA       | -2.011 | 1.25E-004 | 0.211 |
| Z6n_xvX3TtHxtHH2U0  | SEL1L    | 1.606  | 1.49E-004 | 0.211 |
| Bpeyv2kQv0mIggogB5c | ARMCX6   | -1.394 | 1.62E-004 | 0.211 |
| 3UCajp6zXipJBv0TCo  | C9orf43  | 0.689  | 1.66E-004 | 0.211 |
| TYoWYd0HWC0JWR3jxc  | NUP93    | -1.653 | 1.71E-004 | 0.211 |
| HkskAssd7rq8Nr_KSc  | PRDM1    | 1.024  | 1.83E-004 | 0.211 |
| 0F8F188II_7XU0eV4   | TUBA1B   | -0.39  | 1.84E-004 | 0.211 |
| cKeVUq.eR61Xf9X0t8  | MLH3     | -1.911 | 1.99E-004 | 0.214 |
| Kn7e.HJ5ul_hq6eE3s  | ETS2     | -1.661 | 2.27E-004 | 0.214 |
| reF_FiFUMuQSHaOstY  | DUSP6    | -1.564 | 2.28E-004 | 0.214 |
| ie1t1N1n13Ulf_SV78  | NA       | -1.379 | 2.40E-004 | 0.214 |
| 3gq7osjnhfRUieXOVI  | TNNC1    | 0.94   | 2.65E-004 | 0.214 |
| rmqB9Bd3eQp7hQj1QI  | CDCP1    | -1.343 | 2.73E-004 | 0.214 |
| oWIPA14KSFnkWWXkAA  | NA       | -1.87  | 2.84E-004 | 0.214 |
| ir_h054gFRKAke1Kyg  | MFAP1    | -1.08  | 3.04E-004 | 0.214 |
| xU75QpS3gNep0LjXXk  | NA       | 0.991  | 3.10E-004 | 0.214 |
| Qepfnuoledex5zWUg   | C9orf89  | -1.841 | 3.12E-004 | 0.214 |
| KyB4s96IAUOtJH.r_1  | MYNN     | 1.152  | 3.26E-004 | 0.214 |
| o017n3rGln2X0laUXE  | GALR3    | 0.764  | 3.34E-004 | 0.214 |
| TfSd3QigkFQhvRbijY  | NF2      | -1.571 | 3.39E-004 | 0.214 |
| ZHdUeJCbe61zrNBSzc  | ARHGAP24 | 0.524  | 4.02E-004 | 0.232 |
| NLTejns0VUSrNidBmo  | HIPK1    | -1.277 | 4.16E-004 | 0.232 |
| 6k8l5O.crfeULn.dL4  | TMTC2    | 0.728  | 4.19E-004 | 0.232 |
| ijpnYVZIuk3SE7YA14  | CMC1     | -1.158 | 4.28E-004 | 0.232 |
| W5dWOuc9PtRXFIOHmo  | SORBS2   | 0.77   | 4.45E-004 | 0.232 |
| 3ddSK3kr1H0Tlvh3RI  | TBC1D14  | -1.495 | 4.51E-004 | 0.232 |
| fadTvoHtugqBglTIXo  | FAH      | -1.265 | 4.55E-004 | 0.232 |
| l0flqIh.8QdN5J1q5o  | CACNG6   | 0.695  | 5.00E-004 | 0.244 |
| 0Ch9ek_mecjpZuSdK8  | AGRN     | -1.358 | 5.05E-004 | 0.244 |
| r5VigolRK4SogIPIPU  | LARP1    | 0.864  | 5.44E-004 | 0.247 |
| lh1S33UT57TptLOUh0  | VPS8     | -1.787 | 5.60E-004 | 0.247 |
| 6faTpd.EqRfed0r6uE  | VIP      | 0.655  | 5.60E-004 | 0.247 |
| QovQuig56f4ldxHnr4  | NA       | -1.636 | 5.77E-004 | 0.247 |
| QdJ_t1ZKfSABUPkbuo  | PWWP2B   | -1.276 | 5.79E-004 | 0.247 |
| Qp9WAIX7nu6IXQ7pE4  | APEX1    | -0.558 | 6.01E-004 | 0.251 |
| l4AzSPkVV3VT16f_VU  | CADM4    | -1.223 | 6.30E-004 | 0.252 |
| opX0uY0C9xuYiWWDLA  | NDUFC1   | -1.197 | 6.70E-004 | 0.252 |
| QuRecd6iSq4d4SIZS4I | FAM192A  | 1.657  | 6.74E-004 | 0.252 |
| rh2CVIv_u6OJKhA_eI  | HMHB1    | 0.738  | 6.98E-004 | 0.252 |
| xyeqUp93VRRReSP3558 | PCBP4    | -0.742 | 6.99E-004 | 0.252 |
| 6KL5K6C6EnZIKLlk7E  | MYH16    | 0.77   | 7.04E-004 | 0.252 |

**Supplemental Table 9 : List of 50 most significantly *KRAS*-variant differentially expressed genes in the triple negative breast cancer patients identified by LIMMA analysis**

**Supplemental Figure 1: *KRAS*-variant in ER/PR+ versus ER/PR- premenopausal breast cancer patients**

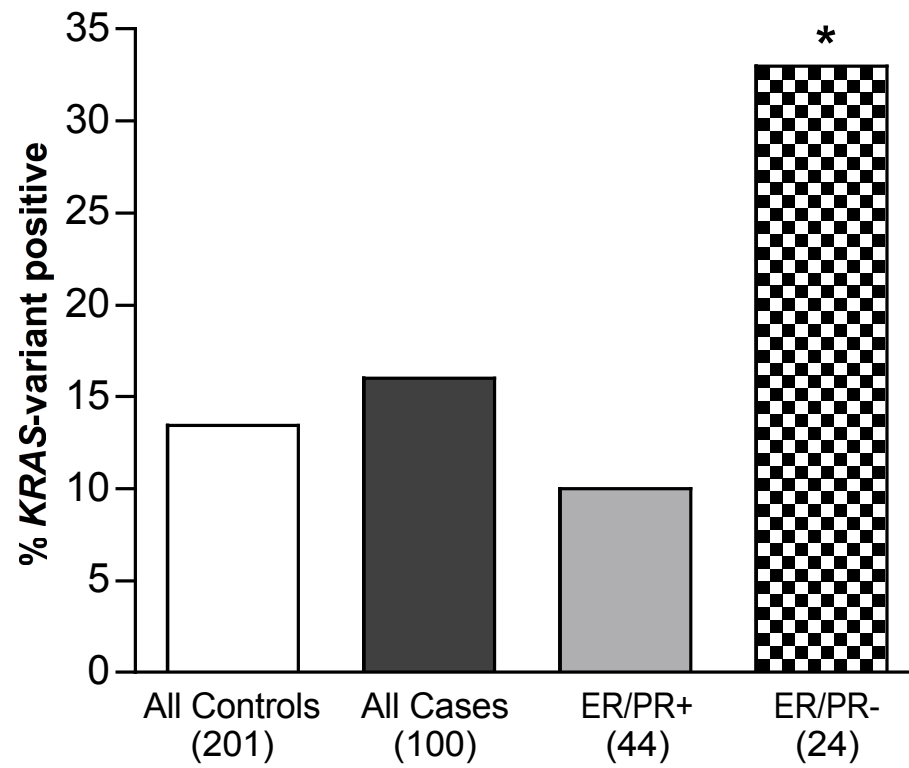

**Supplemental Figure 2: Gene expression signatures associated with the *KRAS*-variant in triple negative breast cancer patient tumors**

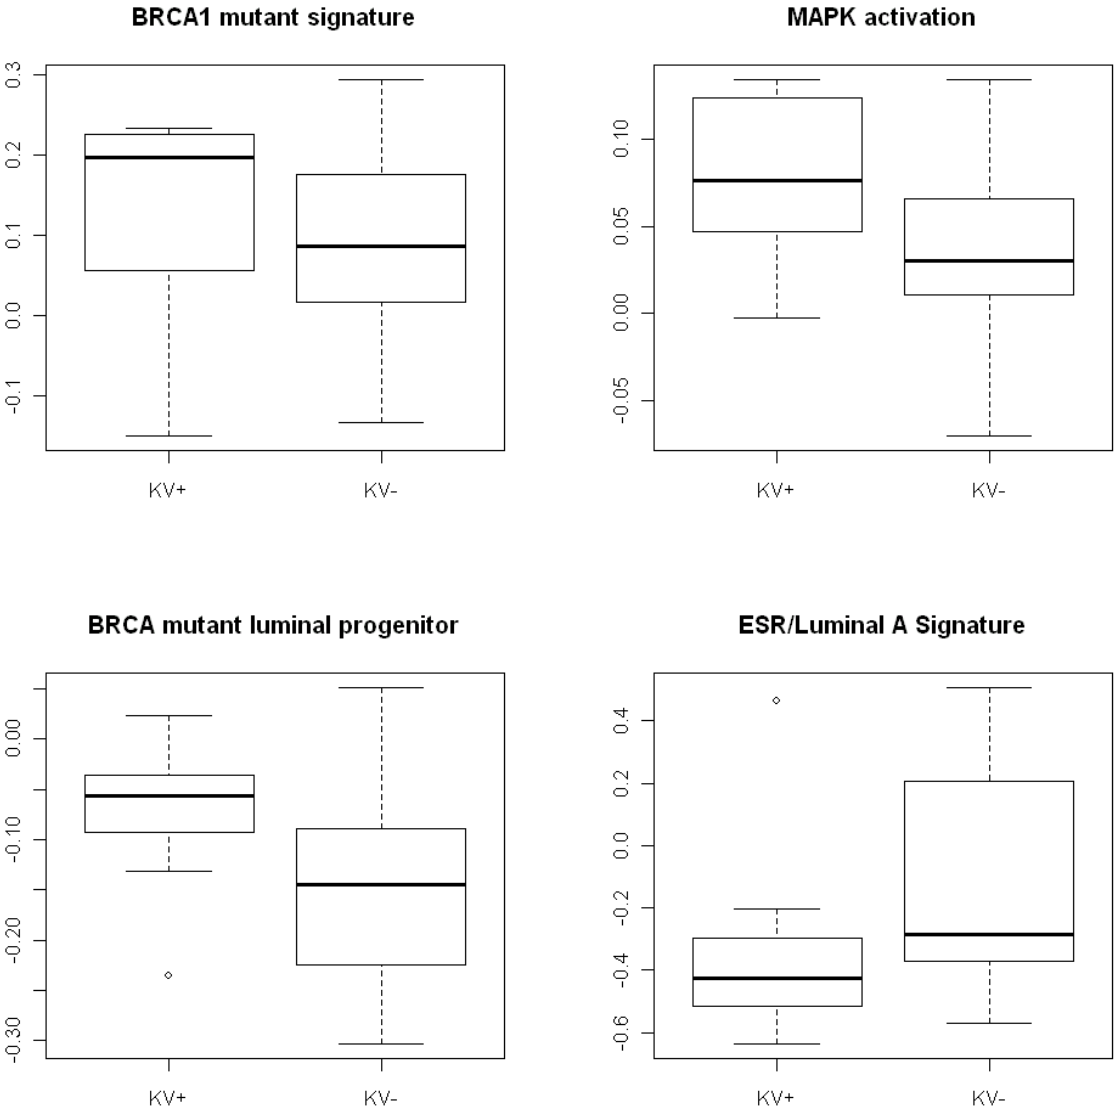

Supplement: NIHMS408024-supplement-Supplement_Data.pdf [file NIHMS408024-supplement-Supplement_Data.pdf]
